# Supplementary material for: Study of genetic variation and its association with tensile strength among bamboo species through whole genome resequencing
Source: Frontiers journal article supplement (doi:10.3389/fpls.2022.935751), 2022-07-27
Supplement: Data_Sheet_1.zip [file Data_Sheet_1.zip]

## Sheet: Top
Supplementary Table 7. SNPs with P-value of 10^-7 or lower from the association analysis of the trait top part of bamboo
CHR	SNP	UNADJ	GC	QQ	BONF	HOLM	SIDAK_SS	SIDAK_SD	FDR_BH	FDR_BY
mdhs10	mdhs10:449802	8.578e-09	0.009599	1.784e-07	0.02404	0.02404	0.02375	0.02375	0.008012	0.1236
mdhs12	mdhs12:47794934	8.578e-09	0.01467	5.353e-07	0.02404	0.02404	0.02375	0.02375	0.008012	0.1236
mdhs22	mdhs22:55632774	8.578e-09	0.01477	8.922e-07	0.02404	0.02404	0.02375	0.02375	0.008012	0.1236
mdhs15	mdhs15:29191820	1.516e-08	0.01538	1.249e-06	0.04247	0.04247	0.04158	0.04158	0.01062	0.1638
mdhs17	mdhs17:72139077	4.337e-08	0.01538	1.606e-06	0.1215	0.1215	0.1144	0.1144	0.02431	0.3749
Genes within 100kb region up/downstream of the SNP with P-value of 10^-7 or lower from the association analysis of the trait top part of bamboo
transcript_id	gene_id	type	strand	seqid	start	Length	description.y	GO.BP	GO.CC	GO.MF
PH02Gene13516.t1	PH02Gene13516	protein_coding	-	mdhs10	405909	2832	WD40-repeat-containing domain superfamily			GO:0005515
PH02Gene13512.t1	PH02Gene13512	protein_coding	-	mdhs10	535435	1167	Pre-mRNA-splicing factor 38
PH02Gene13513.t1	PH02Gene13513	protein_coding	+	mdhs10	519288	1425	Pseudouridine synthase, RsuA/RluB/C/D/E/F	GO:0001522; GO:0009451	GO:0003723; GO:0009982
PH02Gene13514.t1	PH02Gene13514	protein_coding	-	mdhs10	497044	759
PH02Gene13515.t1	PH02Gene13515	protein_coding	+	mdhs10	486307	1239	Lipase, eukaryotic		GO:0016788
PH02Gene13517.t1	PH02Gene13517	protein_coding	+	mdhs10	400613	681	Rossmann-like alpha/beta/alpha sandwich fold
PH02Gene13518.t1	PH02Gene13518	protein_coding	-	mdhs10	371034	585	Domain of unknown function DUF547
PH02Gene21515.t1	PH02Gene21515	protein_coding	+	mdhs12	47774246	2694	Ubiquitin specific protease, conserved site	GO:0006511		GO:0036459
PH02Gene21516.t2	PH02Gene21516	protein_coding	+	mdhs12	47787287	594	YABBY protein	GO:0007275
PH02Gene20832.t1	PH02Gene20832	protein_coding	-	mdhs15	29157736	855
PH02Gene20833.t1	PH02Gene20833	protein_coding	-	mdhs15	29223044	1110	Integral membrane protein EMC3/TMCO1-like		GO:0016020
PH02Gene36721.t1	PH02Gene36721	protein_coding	-	mdhs17	72142212	1386	Sugar transporter, conserved site	GO:0055085	GO:0016021	GO:0005215
PH02Gene36722.t1	PH02Gene36722	protein_coding	-	mdhs17	72125479	369	Ubiquitin-conjugating enzyme/RWD-like
PH02Gene36723.t1	PH02Gene36723	protein_coding	-	mdhs17	72110769	2196	tRNA (guanine-N1-)-methyltransferase, N-terminal
PH02Gene39576.t1	PH02Gene39576	protein_coding	+	mdhs22	55624332	483	Protein of unknown function DUF761, plant
PH02Gene21513.t1	PH02Gene21513	protein_coding	+	mdhs12	47699495	774	Protein BYPASS-related
PH02Gene21514.t1	PH02Gene21514	protein_coding	+	mdhs12	47721846	582	Protein of unknown function DUF3475
PH02Gene36719.t1	PH02Gene36719	protein_coding	-	mdhs17	72204177	1623	GLABROUS1 enhancer-binding protein family	GO:0006355
PH02Gene36720.t1	PH02Gene36720	protein_coding	-	mdhs17	72181358	1668	Signal recognition particle, SRP54 subunit, GTPase domain	GO:0006614		GO:0005525
PH02Gene36723.t1	PH02Gene36723	protein_coding	-	mdhs17	72110769	2196	tRNA (guanine-N1-)-methyltransferase, N-terminal
PH02Gene36724.t1	PH02Gene36724	protein_coding	-	mdhs17	72053015	735	Zinc finger C2H2-type			GO:0003676
PH02Gene20834.t1	PH02Gene20834	protein_coding	+	mdhs15	29260346	318
PH02Gene20835.t1	PH02Gene20835	protein_coding	+	mdhs15	29277473	747
PH02Gene20836.t1	PH02Gene20836	protein_coding	+	mdhs15	29282772	525
PH02Gene20837.t1	PH02Gene20837	protein_coding	-	mdhs15	29290381	2904	ClpA/B, conserved site 1			GO:0005524
PH02Gene39575.t1	PH02Gene39575	protein_coding	+	mdhs22	55540040	456	Thymidylate kinase-like domain

## Sheet: Middle
Supplementary Table 7. SNPs with P-value of 10^-7 or lower from the association analysis of the trait middle part of bamboo
CHR	SNP	UNADJ	GC	QQ	BONF	HOLM	SIDAK_SS	SIDAK_SD	FDR_BH	FDR_BY
mdhs24	mdhs24:23384053	1.219e-07	1.604e-07	7.219e-08	0.844	0.844	0.57	0.57	0.2532	1
mdhs3	mdhs3:3192058	1.604e-07	0.004901	2.166e-07	1	1	0.6708	0.6708	0.2532	1
mdhs3	mdhs3:57077981	4.514e-07	0.009757	3.61e-07	1	1	0.9561	0.9561	0.2532	1
mdhs24	mdhs24:24077821	4.606e-07	0.01114	5.054e-07	1	1	0.9588	0.9588	0.2532	1
Genes within 100kb region up/downstream of the SNP with P-value of 10^-7 or lower from the association analysis of the trait middle part of bamboo
transcript_id	gene_id	type	strand	seqid	start	Length	description.y	GO.BP	GO.CC	GO.MF
PH02Gene48461.t1	PH02Gene48461	protein_coding	-	mdhs24	24070843	1491	Multi antimicrobial extrusion protein	GO:0006855; GO:0055085	GO:0016020	GO:0015238; GO:0015297
PH02Gene48463.t1	PH02Gene48463	protein_coding	-	mdhs24	23365136	1116	TCP-1-like chaperonin intermediate domain superfamily
PH02Gene48464.t1	PH02Gene48464	protein_coding	-	mdhs24	23396528	201
PH02Gene49707.t1	PH02Gene49707	protein_coding	+	mdhs3	3229153	687	Mitochondrial glycoprotein superfamily
PH02Gene08668.t1	PH02Gene08668	protein_coding	-	mdhs3	57104663	1362	Transferase			GO:0016747
PH02Gene49708.t1	PH02Gene49708	protein_coding	+	mdhs3	3237501	1494
PH02Gene08667.t1	PH02Gene08667	protein_coding	+	mdhs3	56991570	762	DNA-binding pseudobarrel domain superfamily

## Sheet: Bottom
Supplementary Table 7. SNPs with P-value of 10^-7 or lower from the association analysis of the trait bottom part of bamboo
CHR	SNP	UNADJ	GC	QQ	BONF	HOLM	SIDAK_SS	SIDAK_SD	FDR_BH	FDR_BY
mdhs1	mdhs1:1182848	2.269e-07	2.855e-07	1.249e-06	0.6359	0.6359	0.4705	0.4705	0.02105	0.3246
mdhs1	mdhs1:28536062	2.704e-07	3.402e-07	3.747e-06	0.7576	0.7576	0.5312	0.5312	0.02105	0.3246
mdhs13	mdhs13:17586583	2.704e-07	3.402e-07	7.316e-06	0.7576	0.7576	0.5312	0.5312	0.02105	0.3246
mdhs14	mdhs14:11635563	2.269e-07	2.855e-07	1.606e-06	0.6359	0.6359	0.4705	0.4705	0.02105	0.3246
mdhs14	mdhs14:40916963	2.307e-07	2.902e-07	2.677e-06	0.6464	0.6464	0.4761	0.4761	0.02105	0.3246
mdhs15	mdhs15:7008276	2.704e-07	3.402e-07	7.673e-06	0.7576	0.7576	0.5312	0.5312	0.02105	0.3246
mdhs15	mdhs15:97806442	2.704e-07	3.402e-07	8.03e-06	0.7576	0.7576	0.5312	0.5312	0.02105	0.3246
mdhs2	mdhs2:4477965	1.719e-07	2.163e-07	1.784e-07	0.4816	0.4816	0.3822	0.3822	0.02105	0.3246
mdhs2	mdhs2:31008593	1.719e-07	2.163e-07	5.353e-07	0.4816	0.4816	0.3822	0.3822	0.02105	0.3246
mdhs2	mdhs2:27794795	2.307e-07	2.902e-07	1.963e-06	0.6464	0.6464	0.4761	0.4761	0.02105	0.3246
mdhs2	mdhs2:44661769	2.704e-07	3.402e-07	4.104e-06	0.7576	0.7576	0.5312	0.5312	0.02105	0.3246
mdhs21	mdhs21:19968282	2.704e-07	3.402e-07	8.386e-06	0.7576	0.7576	0.5312	0.5312	0.02105	0.3246
mdhs23	mdhs23:64365663	2.107e-07	2.651e-07	8.922e-07	0.5904	0.5904	0.4459	0.4459	0.02105	0.3246
mdhs23	mdhs23:14148045	2.704e-07	3.402e-07	8.743e-06	0.7576	0.7576	0.5312	0.5312	0.02105	0.3246
mdhs23	mdhs23:50200516	2.704e-07	3.402e-07	9.1e-06	0.7576	0.7576	0.5312	0.5312	0.02105	0.3246
mdhs24	mdhs24:5355526	2.704e-07	3.402e-07	9.457e-06	0.7576	0.7576	0.5312	0.5312	0.02105	0.3246
mdhs24	mdhs24:7803817	2.704e-07	3.402e-07	9.814e-06	0.7576	0.7576	0.5312	0.5312	0.02105	0.3246
mdhs24	mdhs24:9688879	2.704e-07	3.402e-07	1.017e-05	0.7576	0.7576	0.5312	0.5312	0.02105	0.3246
mdhs24	mdhs24:23550072	2.704e-07	3.402e-07	1.053e-05	0.7576	0.7576	0.5312	0.5312	0.02105	0.3246
mdhs24	mdhs24:33877513	2.704e-07	3.402e-07	1.088e-05	0.7576	0.7576	0.5312	0.5312	0.02105	0.3246
mdhs24	mdhs24:41799267	2.704e-07	3.402e-07	1.124e-05	0.7576	0.7576	0.5312	0.5312	0.02105	0.3246
mdhs3	mdhs3:44491749	2.704e-07	3.402e-07	4.461e-06	0.7576	0.7576	0.5312	0.5312	0.02105	0.3246
mdhs4	mdhs4:24427643	2.704e-07	3.402e-07	4.818e-06	0.7576	0.7576	0.5312	0.5312	0.02105	0.3246
mdhs5	mdhs5:9955383	2.704e-07	3.402e-07	5.175e-06	0.7576	0.7576	0.5312	0.5312	0.02105	0.3246
mdhs7	mdhs7:32716012	2.704e-07	3.402e-07	5.531e-06	0.7576	0.7576	0.5312	0.5312	0.02105	0.3246
mdhs7	mdhs7:59602237	2.704e-07	3.402e-07	5.888e-06	0.7576	0.7576	0.5312	0.5312	0.02105	0.3246
mdhs7	mdhs7:59650075	2.704e-07	3.402e-07	6.245e-06	0.7576	0.7576	0.5312	0.5312	0.02105	0.3246
mdhs7	mdhs7:37866071	8.284e-07	1.042e-06	1.338e-05	1	1	0.9018	0.9018	0.06108	0.9421
mdhs8	mdhs8:74466932	2.307e-07	2.902e-07	2.32e-06	0.6464	0.6464	0.4761	0.4761	0.02105	0.3246
mdhs8	mdhs8:60303795	2.704e-07	3.402e-07	6.602e-06	0.7576	0.7576	0.5312	0.5312	0.02105	0.3246
mdhs9	mdhs9:7747072	2.704e-07	3.402e-07	6.959e-06	0.7576	0.7576	0.5312	0.5312	0.02105	0.3246
mdhs9	mdhs9:2651729	3.387e-07	4.262e-07	1.303e-05	0.9492	0.9491	0.6129	0.6129	0.02565	0.3956
Genes within 100kb region up/downstream of the SNP with P-value of 10^-7 or lower from the association analysis of the trait bottom part of bamboo
transcript_id	gene_id	type	strand	seqid	start	Length	description.y	GO.BP	GO.CC	GO.MF
PH02Gene02297.t1	PH02Gene02297	protein_coding	+	mdhs23	14054158	921	AT-hook motif nuclear-localized protein 15-29			GO:0003680
PH02Gene02298.t1	PH02Gene02298	protein_coding	+	mdhs23	14088626	1134	PPC domain
PH02Gene02299.t1	PH02Gene02299	protein_coding	-	mdhs23	14124750	459	Late embryogenesis abundant protein, LEA_1 subgroup	GO:0009793
PH02Gene02300.t2	PH02Gene02300	protein_coding	-	mdhs23	14152522	1395
PH02Gene02301.t1	PH02Gene02301	protein_coding	-	mdhs23	14156646	1233	Zinc finger, RING/FYVE/PHD-type
PH02Gene02302.t1	PH02Gene02302	protein_coding	-	mdhs23	14163919	1197	Mannosyltransferase ALG2	GO:0006486		GO:0004378
PH02Gene02303.t1	PH02Gene02303	protein_coding	-	mdhs23	14168185	1644	Phosphoglycerate kinase superfamily	GO:0006096		GO:0004618
PH02Gene02304.t1	PH02Gene02304	protein_coding	+	mdhs23	14176575	393	Heat shock protein DnaJ, cysteine-rich domain superfamily
PH02Gene02305.t1	PH02Gene02305	protein_coding	-	mdhs23	14203585	4617	ABC transporter, conserved site			GO:0005524; GO:0016887
PH02Gene02344.t1	PH02Gene02344	protein_coding	+	mdhs7	37901263	507	Ankyrin repeat-containing domain superfamily
PH02Gene02345.t1	PH02Gene02345	protein_coding	-	mdhs7	37879113	447	Alpha/Beta hydrolase fold
PH02Gene02346.t3	PH02Gene02346	protein_coding	-	mdhs7	37852868	2178	Superoxide dismutase, copper/zinc, binding site	GO:0055114		GO:0004784
PH02Gene02347.t1	PH02Gene02347	protein_coding	+	mdhs7	37842538	1227	S-adenosyl-L-methionine-dependent methyltransferase
PH02Gene02348.t1	PH02Gene02348	protein_coding	+	mdhs7	37787630	1437	Zinc finger, RING-type, conserved site
PH02Gene02349.t1	PH02Gene02349	protein_coding	+	mdhs7	37766154	267	Exocyst complex component Exo70	GO:0006887	GO:0000145
PH02Gene03136.t1	PH02Gene03136	protein_coding	-	mdhs7	32726950	300	Conserved hypothetical protein CHP01589, plant
PH02Gene03137.t1	PH02Gene03137	protein_coding	+	mdhs7	32692794	420	ADF/Cofilin	GO:0030042	GO:0015629
PH02Gene10680.t2	PH02Gene10680	protein_coding	+	mdhs23	64295745	942
PH02Gene10681.t1	PH02Gene10681	protein_coding	-	mdhs23	64303313	1707	Aspartic peptidase, active site	GO:0006508		GO:0004190
PH02Gene10682.t1	PH02Gene10682	protein_coding	-	mdhs23	64377310	666	Thioredoxin-like superfamily
PH02Gene12442.t1	PH02Gene12442	protein_coding	-	mdhs21	19882782	1221
PH02Gene12443.t1	PH02Gene12443	protein_coding	+	mdhs21	19917024	2271	Calcium-dependent channel, 7TM region, putative phosphate		GO:0016020
PH02Gene12444.t1	PH02Gene12444	protein_coding	-	mdhs21	19963003	1356	Tubulin, conserved site	GO:0007017	GO:0005874	GO:0005525
PH02Gene12445.t2	PH02Gene12445	protein_coding	-	mdhs21	19994840	1068	Helix-loop-helix DNA-binding domain superfamily			GO:0046983
PH02Gene13953.t5	PH02Gene13953	protein_coding	+	mdhs8	60238254	1005	ArfGAP domain superfamily
PH02Gene13954.t1	PH02Gene13954	protein_coding	+	mdhs8	60262961	633	Myb domain, plants
PH02Gene13955.t1	PH02Gene13955	protein_coding	-	mdhs8	60278159	291	EF-hand domain pair
PH02Gene13956.t1	PH02Gene13956	protein_coding	-	mdhs8	60315851	1509	Alpha/Beta hydrolase fold
PH02Gene13957.t1	PH02Gene13957	protein_coding	-	mdhs8	60375681	684	Protein of unknown function DUF604
PH02Gene18710.t1	PH02Gene18710	protein_coding	+	mdhs1	1128768	1539	Protein OCTOPUS-like
PH02Gene18712.t1	PH02Gene18712	protein_coding	-	mdhs1	1176134	1206	Laccase, second cupredoxin domain
PH02Gene18713.t1	PH02Gene18713	protein_coding	+	mdhs1	1190993	801	Fatty acid hydroxylase	GO:0008610; GO:0055114		GO:0005506; GO:0016491
PH02Gene18713.t1	PH02Gene18713	protein_coding	+	mdhs1	1190993	801	Fatty acid hydroxylase	GO:0008610; GO:0055114		GO:0005506; GO:0016491
PH02Gene18714.t1	PH02Gene18714	protein_coding	+	mdhs1	1198581	690
PH02Gene18715.t1	PH02Gene18715	protein_coding	+	mdhs1	1242000	390
PH02Gene18716.t1	PH02Gene18716	protein_coding	+	mdhs1	1269402	420	Ribosomal protein L28/L24 superfamily			GO:0003735
PH02Gene18717.t1	PH02Gene18717	protein_coding	+	mdhs1	1269991	762	Fatty acid hydroxylase	GO:0008610; GO:0055114		GO:0005506; GO:0016491
PH02Gene20517.t1	PH02Gene20517	protein_coding	-	mdhs15	6935099	1065	Myb domain, plants
PH02Gene20518.t1	PH02Gene20518	protein_coding	-	mdhs15	6951882	324	NADH:ubiquinone oxidoreductase, B18 subunit		GO:0005739	GO:0003954; GO:0008137
PH02Gene20519.t1	PH02Gene20519	protein_coding	-	mdhs15	6999812	717	Helix-loop-helix DNA-binding domain superfamily			GO:0046983
PH02Gene20520.t1	PH02Gene20520	protein_coding	+	mdhs15	7001590	1062	Papain-like cysteine peptidase superfamily
PH02Gene20521.t1	PH02Gene20521	protein_coding	-	mdhs15	7004356	885
PH02Gene20522.t1	PH02Gene20522	protein_coding	+	mdhs15	7052865	1725	AMP-binding, conserved site
PH02Gene25842.t1	PH02Gene25842	protein_coding	-	mdhs24	41770146	513	Winged helix-like DNA-binding domain superfamily
PH02Gene27779.t1	PH02Gene27779	protein_coding	-	mdhs9	2711757	1377	AP2/ERF domain	GO:0006355		GO:0003700
PH02Gene27780.t1	PH02Gene27780	protein_coding	+	mdhs9	2682058	1128	Zinc finger C2H2-type			GO:0003676
PH02Gene27781.t1	PH02Gene27781	protein_coding	-	mdhs9	2676286	1134	Integral membrane protein TerC, riboswitch-linked		GO:0016021
PH02Gene27782.t1	PH02Gene27782	protein_coding	+	mdhs9	2673369	588	Protein of unknown function DUF1218
PH02Gene27783.t1	PH02Gene27783	protein_coding	-	mdhs9	2639891	3198	Kinesin motor domain, conserved site	GO:0007018		GO:0003777; GO:0005524
PH02Gene27784.t1	PH02Gene27784	protein_coding	-	mdhs9	2608866	1023
PH02Gene27785.t1	PH02Gene27785	protein_coding	+	mdhs9	2586356	573	MoaB/Mog-like domain superfamily
PH02Gene27786.t2	PH02Gene27786	protein_coding	-	mdhs9	2579653	600
PH02Gene27787.t1	PH02Gene27787	protein_coding	+	mdhs9	2556391	3981
PH02Gene29606.t1	PH02Gene29606	protein_coding	+	mdhs9	7743506	735	PGG domain
PH02Gene32932.t1	PH02Gene32932	protein_coding	-	mdhs2	4480818	243
PH02Gene32933.t1	PH02Gene32933	protein_coding	-	mdhs2	4488756	3174	P-loop containing nucleoside triphosphate hydrolase
PH02Gene32934.t1	PH02Gene32934	protein_coding	-	mdhs2	4543853	909	Protein of unknown function DUF868, plant
PH02Gene34887.t1	PH02Gene34887	protein_coding	-	mdhs4	24483487	1500	UDP-glycosyltransferase family, conserved site
PH02Gene34888.t1	PH02Gene34888	protein_coding	-	mdhs4	24425003	1509	UDP-glycosyltransferase family, conserved site
PH02Gene34889.t1	PH02Gene34889	protein_coding	-	mdhs4	24355499	930	Transcription factor TFIIB	GO:0006355; GO:0070897
PH02Gene35572.t1	PH02Gene35572	protein_coding	+	mdhs14	40863361	396	Ribosomal L18e/L15P superfamily
PH02Gene35573.t1	PH02Gene35573	protein_coding	+	mdhs14	40871081	1602	Cytochrome P450, conserved site	GO:0055114		GO:0016705
PH02Gene35574.t1	PH02Gene35574	protein_coding	+	mdhs14	40943959	936	Cytochrome P450 superfamily	GO:0055114		GO:0005506; GO:0016705; GO:0020037
PH02Gene35575.t1	PH02Gene35575	protein_coding	-	mdhs14	40994168	501	Cytochrome P450 superfamily	GO:0055114		GO:0005506; GO:0016705; GO:0020037
PH02Gene35576.t1	PH02Gene35576	protein_coding	+	mdhs14	41007267	1587	Cytochrome P450, conserved site	GO:0055114		GO:0016705
PH02Gene35610.t1	PH02Gene35610	protein_coding	+	mdhs7	59691517	3003	P-loop containing nucleoside triphosphate hydrolase
PH02Gene35611.t1	PH02Gene35611	protein_coding	-	mdhs7	59668767	468	Glycoside hydrolase, family 3, N-terminal domain superfamily	GO:0005975		GO:0004553
PH02Gene36287.t1	PH02Gene36287	protein_coding	-	mdhs15	97897489	951	Heavy metal-associated domain superfamily	GO:0030001		GO:0046872
PH02Gene36288.t1	PH02Gene36288	protein_coding	-	mdhs15	97889132	564
PH02Gene36289.t1	PH02Gene36289	protein_coding	+	mdhs15	97886074	384	Short transmembrane mitochondrial protein 1
PH02Gene36290.t1	PH02Gene36290	protein_coding	+	mdhs15	97881456	1836	Aminopeptidase, leukotriene A4 hydrolase-like
PH02Gene36291.t1	PH02Gene36291	protein_coding	+	mdhs15	97856966	1251
PH02Gene36292.t1	PH02Gene36292	protein_coding	+	mdhs15	97832366	1281	AP2/ERF domain	GO:0006355		GO:0003700
PH02Gene36293.t1	PH02Gene36293	protein_coding	-	mdhs15	97740439	702	Alfin	GO:0006355		GO:0042393
PH02Gene36294.t1	PH02Gene36294	protein_coding	+	mdhs15	97709010	1533	Histidine acid phosphatase active site
PH02Gene36318.t1	PH02Gene36318	protein_coding	+	mdhs23	50220473	750	Glycosyl transferase, family 31	GO:0006486	GO:0016020	GO:0008378
PH02Gene37045.t5	PH02Gene37045	protein_coding	+	mdhs8	74460431	2085	DNA-binding pseudobarrel domain superfamily
PH02Gene37046.t1	PH02Gene37046	protein_coding	+	mdhs8	74486389	711	Copper chaperone SCO1/SenC
PH02Gene40105.t1	PH02Gene40105	protein_coding	-	mdhs24	9762101	225
PH02Gene40106.t1	PH02Gene40106	protein_coding	-	mdhs24	9668699	402	Leucine-rich repeat domain superfamily
PH02Gene41557.t1	PH02Gene41557	protein_coding	-	mdhs2	31017964	1923	Tetratricopeptide-like helical domain superfamily			GO:0005515
PH02Gene43236.t1	PH02Gene43236	protein_coding	-	mdhs24	41812306	873	Histone-fold			GO:0046982
PH02Gene43237.t1	PH02Gene43237	protein_coding	-	mdhs24	41835757	1536	Cytochrome P450, conserved site	GO:0055114		GO:0016705
PH02Gene43238.t1	PH02Gene43238	protein_coding	-	mdhs24	41871782	1191	EamA domain		GO:0016020; GO:0016021
PH02Gene44169.t1	PH02Gene44169	protein_coding	+	mdhs14	11523355	627	Ribosomal protein S4e	GO:0006412	GO:0005622; GO:0005840	GO:0003735
PH02Gene44170.t1	PH02Gene44170	protein_coding	-	mdhs14	11584030	564	Leucine-rich repeat domain superfamily
PH02Gene44171.t1	PH02Gene44171	protein_coding	-	mdhs14	11585889	1359	P-loop containing nucleoside triphosphate hydrolase
PH02Gene44172.t1	PH02Gene44172	protein_coding	-	mdhs14	11592491	2214	P-loop containing nucleoside triphosphate hydrolase
PH02Gene44173.t1	PH02Gene44173	protein_coding	+	mdhs14	11661935	570	Ribosomal protein S4e, N-terminal, conserved site
PH02Gene44174.t1	PH02Gene44174	protein_coding	-	mdhs14	11681811	561	EF-Hand 1, calcium-binding site
PH02Gene44175.t1	PH02Gene44175	protein_coding	-	mdhs14	11711361	327	Alpha/Beta hydrolase fold
PH02Gene44176.t1	PH02Gene44176	protein_coding	-	mdhs14	11730710	405	Ferric reductase, NAD binding domain	GO:0055114		GO:0016491
PH02Gene45304.t1	PH02Gene45304	protein_coding	+	mdhs1	28556434	768	AUX/IAA domain
PH02Gene45305.t1	PH02Gene45305	protein_coding	-	mdhs1	28523275	837	Nicotianamine synthase	GO:0030418		GO:0030410
PH02Gene46684.t1	PH02Gene46684	protein_coding	-	mdhs24	5374592	1218	Methionyl-tRNA synthetase, Zn-domain
PH02Gene46685.t1	PH02Gene46685	protein_coding	-	mdhs24	5384465	1047	Starch synthase, catalytic domain
PH02Gene46686.t1	PH02Gene46686	protein_coding	+	mdhs24	5325543	486	Domain of unknown function DUF4220
PH02Gene46740.t1	PH02Gene46740	protein_coding	+	mdhs23	50229414	750	Glycosyl transferase, family 31	GO:0006486	GO:0016020	GO:0008378
PH02Gene47277.t1	PH02Gene47277	protein_coding	+	mdhs24	23552705	456	Importin-alpha, importin-beta-binding domain	GO:0006606		GO:0061608
PH02Gene47778.t1	PH02Gene47778	protein_coding	+	mdhs5	9968181	828	P-loop containing nucleoside triphosphate hydrolase
PH02Gene49121.t1	PH02Gene49121	protein_coding	-	mdhs7	59607184	1710	Leucine-rich repeat domain superfamily
